# Supplementary material
Source: PubMed Central journal article supplement (PMC9474786)
Supplement: 10815_2022_2580_MOESM1_ESM.pdf [file 10815_2022_2580_MOESM1_ESM.pdf]

1  
2  
3  
4  
5  
6  
7  
8  
9  
10  
11  
12  
13  
14  
15  
16  
17  
18  
19  
20  
21  
22  
23  
24  
25  
26  
27  
28  
29  
30  
31  
32  
33  
34  
35  
36  
37

**Supplementary data**

**mRNA transcripts of minigene constructs expressed in HEK293T cells**

Sequences in red are PCR primers, PI12-132F and PI12-132R. Sequences marked by green color are adenovirus exonic Sequence of vector.

**pIN12-In45-56 vector**

TAGAGAACCCACTGCTTACTGGCTTATCGAAATTAATACGACTCACTATAGGGAGACCCAAGCTTAGCT  
TGGTACCGAGCTCGGATCCACTAGTAACGGCCGCCAGTGTGCTGGAATTGAGCTCACTCTCTCCGCA  
TCGCTGTCTGCGAGGTACCCTACCAGGGATTAAAGACAATGTCTATCGACAGAGAAGAAAGTATTTG  
TGGATGTGGCCATGGGTTATAAATATGGTCAGCCCATCCCAGGGTGGAGTATACTGAAGAAGAACTA  
AAACTTGGGGTGTGTATTCGGGAGCTCTCCAACTCTATCCCCTCATGCTTGCCGAGAGTATTTGA  
AAAACCTCCCTCTGCTGACTAAATACTGTGGCTACAGAGAGGACAATGTGCCTCAACTCGAAGATGTCT  
CCATGTTTCTGAAAGTTCGCGGTGAGCTGCAGGACAACTCTTCGCGGTCTCTATGCATCTCCGAA  
TCCAGAGCTAAGCTTACTAGAGCTAGAGGGCCCTATTCTATAGTGTACCTAAAT

**c.1978-2A>C**

Exon16+Exon17 373 bp

TAGAGAACCCACTGCTTACTGGCTTATCGAAATTAATACGACTCACTATAGGGAGACCCAAGCTTAGCT  
TGGTACCGAGCTCGGATCCACTAGTAACGGCCGCCAGTGTGCTGGAATTGAGCTCACTCTCTCCGCA  
TCGCTGTCTGCGAGGTACCCTACCAGTTACTACCAGTACTTTAGCTATGGGAGTAAATTTGCCTGCTCA  
CCTAGTAGTTATAAAATCTACAATGCATTATGCTGGAGGACTGTTTGAAGAGTACAGTAAACAGATAT  
TCTACAGATGATTGGTAGAGCTGGTCGACCTCAATTTGACACTACAGCTACTGCAGTTATCATGACTCG  
ATTAAGCACAAAGGACAAGTACATTCAGATGTTAGCTTGTAGAGACTGTAGAAAGCAGTTCGCGGT  
GAGCTGCAGGACAACTCTTCGCGGTCTCTATGCATCTCCGAACTCCAGAGCTAAGCTTACTAGAG  
CTAGAGGGCCCTATTCTATAGTGTACCTAAAT

Alternative splicing only Exon16 retained 278 bp

TAGAGAACCCACTGCTTACTGGCTTATCGAAATTAATACGACTCACTATAGGGAGACCCAAGCTTAGCT  
TGGTACCGAGCTCGGATCCACTAGTAACGGCCGCCAGTGTGCTGGAATTGAGCTCACTCTCTCCGCA  
TCGCTGTCTGCGAGGTACCCTACCAGTTACTACCAGTACTTTAGCTATGGGAGTAAATTTGCCTGCTCACCTAG  
TAGTTATAAAATCTACAATGCATTATGCTGGAGGACTGTTTGAAGAGTACAGTAAACAGATATTCACAGATGAT  
TGGTAGAGCTGGTCGACCTCAAGTTCGCGGTGAGCTGCAGGACAACTCTTCGCGGTCTCTATGCATCTC  
TCAACGCCAACAGCTAAGCTTACTAGAGCTAGAGGGCCCTATTCTATAGTGTACCTAAAT

1 **c.2680+3\_2680+4delAT**

2 **Splicing in wildtype construct**

3 Exon24+Exon25 363 bp

4 TAGAGAACCCACTGCTTACTGGCTTATCGAAATTAATACGACTCACTATAGGGAGACCCAAGCTTAGCT  
5 TGGTACCGAGCTCGGATCCACTAGTAACGGCCGCCAGTGTGCTGGAATTGAGCTCACTCTCTCCGCA  
6 FCGTGTCTGCGAGGTACCCTACCAGTCTTATTCAGGCTCAACTAGGATGCATCCCATAACAAGATTTTGCTTT  
7 GACACAAGATACCGCAAAGATTTTCAGACATGGCTCCCGAATTACAAGATGGTTGTCAGATTTTGTAGCTGCTCAA  
8 GAAAAGAAGTTTGTGTACTATTGAATAGTTTATTTAGCTAAATGTTTATAGGTGTAACCTTTGGGAAAACCTCTC  
9 TGCATGTATCCAAACAACcTGGAAAAAATTGTCGCGGTTGAGCTGCAGGACAAACTCTTCGCGGTCTCTAT  
10 GCATCCTCCGAACGCCAAGGCTAAGCTTACTAGAGCTAGAGGGCCCTATTCTATAGTGTACCTAAA  
11 T

12 Exon24 230 bp

13 TAGAGAACCCACTGCTTACTGGCTTATCGAAATTAATACGACTCACTATAGGGAGACCCAAGCTTAGCT  
14 TGGTACCGAGCTCGGATCCACTAGTAACGGCCGCCAGTGTGCTGGAATTGAGCTCACTCTCTCCGCA  
15 FCGTGTCTGCGAGGTACCCTACCAGTCTTATTCAGGCTCAACTAGGATGCATCCCATAACAAGATTTTGCTTT  
16 GACACAAGATACCGCAAAGATTTTCAGACATGGCTCCCGAATTACAAGATGTCGCGGTTGAGCTGCAGGACAAA  
17 CTCTTCGCGGTCTCTATGCATCCTCCGAACGCCAAGGCTAAGCTTACTAGAGCTAGAGGGCCCTATT  
18 CTATAGTGTACCTAAAAT

19 **Splicing in variant construct**

20 Exon24+Intron24+Exon25 446 bp

21 TAGAGAACCCACTGCTTACTGGCTTATCGAAATTAATACGACTCACTATAGGGAGACCCAAGCTTAGCT  
22 TGGTACCGAGCTCGGATCCACTAGTAACGGCCGCCAGTGTGCTGGAATTGAGCTCACTCTCTCCGCA  
23 FCGTGTCTGCGAGGTACCCTACCAGTCTTATTCAGGCTCAACTAGGATGCATCCCATAACAAGATTTT  
24 GCTTTGACACAAGATACCGCAAAGATTTTCAGACATGGCTCCCGAATTACAAGATGtatgttacaggat  
25 tagtggatttttaaatatTTTTTccaataaaactggatatttagatttaataactggaactTTTTTTTTtag  
26 GGTTGTCAGATTTTGTAGCTGCTCAAGAAAAGAAGTTTGTGTACTATTGAATAGTTTGTATTTAGCTA  
27 AATGTTTTAGGTGTAACCTTTGGGAAAACCTCTGTCATGTATCCAAACAACcTGGAAAAAATTGTCG  
28 GGTGAGCTGCAGGACAAACTCTTCGCGGTCTCTATGCATCCTCCGAACGCCAAGGCTAAGCTTACT  
29 AGAGCTAGAGGGCCCTATTCTATAGTGTACCTAAAAT

30 Exon25 265 bp

31 TAGAGAACCCACTGCTTACTGGCTTATCGAAATTAATACGACTCACTATAGGGAGACCCAAGCTTAGCT  
32 TGGTACCGAGCTCGGATCCACTAGTAACGGCCGCCAGTGTGCTGGAATTGAGCTCACTCTCTCCGCA  
33 FCGTGTCTGCGAGGTACCCTACCAGGTTGTCAGATTTTGTAGCTGCTCAAGAAAAGAAGTTTGTGTACTAT  
34 TGAATAGTTTATTTAGCTAAATGTTTATAGGTGTAACCTTTGGGAAAACCTCTGTCATGTATCCAAACAACcTGG  
35 AAAAAATTGTCGCGGTTGAGCTGCAGGACAAACTCTTCGCGGTCTCTATGCATCCTCCGAACGCCAAGG  
36 CTAAAGCTTACTAGAGCTAGAGGGCCCTATTCTATAGTGTACCTAAAAT

37

38

39

1 Supplementary table 1 Semen Characteristics of II-2 and II-3's spouses

2

Semen Characteristics

|               | pH  | Volume (ml) | Sperm density (10 <sup>6</sup> /ml) | Total progressive motility (10 <sup>6</sup> ) | sperm fragmentation (%) | DNA index |
|---------------|-----|-------------|-------------------------------------|-----------------------------------------------|-------------------------|-----------|
| II-2's spouse | 7.4 | 4.8         | 71.5                                | 234                                           | 17.5                    |           |
| II-3's spouse | 7.4 | 6.0         | 31                                  | 82.8                                          | 14                      |           |

3

4

5

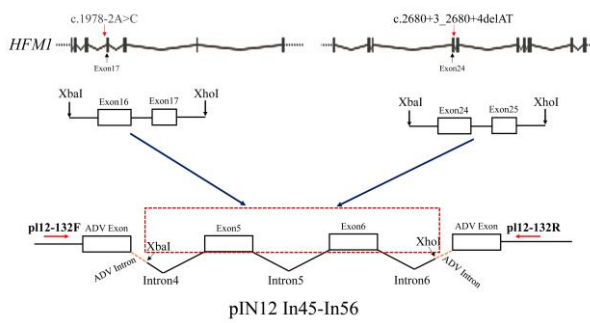

6

7 Supplemental figure S1. Schematic representation of hybrid minigene construction to test the effect of  
8 the candidate mutations.

9 Mutant and wildtype amplicons covering *HFM1* variant sites, c.1978-2A>C and  
10 c.2680+3\_2680+4delAT, respectively, were inserted into pIN12 In45-In56 vectors between restriction  
11 sites Xba I and Xho I. Primer pI12132F and pI12-132R were used to test the effects of splice site  
12 mutations.

13

*HFM1*; NM\_001017975.4: c.1978-2A>C

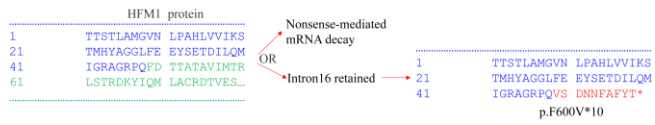

*HFM1*; NM\_001017975.4: c.2680+3\_2680+4delAT

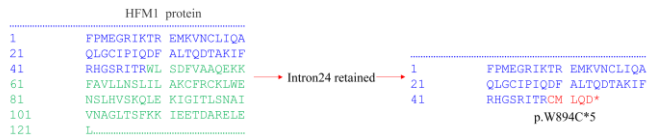

- 1
- 2 Supplemental figure S2. Amino acid sequence changes of splicing variants, c.1978-2A>C (upper part)
- 3 and c.2680+3\_2680+4delAT (lower part), in *HFM1* gene. Changes in the amino acid sequence of the
- 4 *HFM1* variants are marked by in red font.
